# Supplementary material for: Optimization and model reduction in the high dimensional parameter space of a budding yeast cell cycle model
Source: PubMed Central journal article supplement (PMC3702416; doi:10.1186/1752-0509-7-53), 2013-06-28
Supplement: 1752-0509-7-53-S1.pdf [file 1752-0509-7-53-S1.pdf]

Table S1: Model parameters

| Parameter      | Description                        | Parameter        | Description                              |
|----------------|------------------------------------|------------------|------------------------------------------|
| $\gamma$       | Time scale for protein activation  | $kd_{swi5}$      | Degradation rate of Swi5                 |
| $\gamma_{ki}$  | CKI inactivation time scale        | $ka_{swi5,14}$   | Swi5 activation by Cdc14                 |
| $\gamma_{cp}$  | APC activation time scale          | $ki_{swi5,b2}$   | Swi5 inactivation by Clb2                |
| $\gamma_{tem}$ | Tem1 activation time scale         | $ka_{m1,b2}$     | Mcm1 activation by Clb2                  |
| $\sigma$       | Sigmoidicity of protein activation | $ki_{m1}$        | Basal Mcm1 inactivation                  |
| $\sigma_{net}$ | Sigmoidicity of Net1 activation    | $ks_{20}$        | Basal Cdc20 synthesis                    |
| $ks_{n3}$      | Cln3 synthesis rate                | $ks_{20,m1}$     | Mcm1-dependent Cdc20 synthesis           |
| $J_{n3}$       | Michaelis-Menten constant          | $kd_{20}$        | Cdc20 degradation                        |
| $D_{n3}$       | Dosage of CLN3 gene                | $ka_{20}$        | Basal Cdc20 activation                   |
| $kd_{n3}$      | Cln3 degradation rate              | $kd_{b5,20,i}$   | Clb5 degradation by Cdc20                |
| $ks_{k2}$      | Bck2 synthesis rate                | $kd_{clb2,20,i}$ | Clb2 degradation by Cdc20                |
| $kd_{k2}$      | Bck2 degradation rate              | $ki_{20,ori}$    | Cdc20 inactivation by spindle checkpoint |
| $kdp_{i5}$     | Basal Whi5 dephosphorylation       | $ka_{cp,b2}$     | APC phosphorylation by Clb2              |
| $kdp_{i5,14}$  | Whi5 dephosphorylation by Cdc14    | $ki_{cp}$        | APC inactivation                         |
| $kp_{i5}$      | Basal Whi5 phosphorylation         | $ka_{h1}$        | Basal Cdh1 activation                    |
| $kp_{i5,n3}$   | Whi5 phosphorylation by Cln3       | $ka_{h1,14}$     | Cdh1 activation by Cdc14                 |
| $kp_{i5,k2}$   | Whi5 phosphorylation by Bck2       | $ki_{h1}$        | Basal inactivation of Cdh1               |
| $kp_{i5,n2}$   | Whi5 phosphorylation by Cln2       | $ki_{h1,e}$      | Cdh1 inactivation rate                   |
| $kp_{i5,b5}$   | Whi5 phosphorylation by Clb5       | $e_{h1,n3}$      | Cdh1 inactivation by Cln3                |
| $kdp_{bf}$     | Basal SBF dephosphorylation        | $e_{h1,n2}$      | Cdh1 inactivation by Cln2                |
| $kp_{bf,b2}$   | SBF phosphorylation by Clb2        | $e_{h1,b5}$      | Cdh1 inactivation by Clb5                |
| $ks_{n2}$      | Basal Cln2 synthesis rate          | $e_{h1,b2}$      | Cdh1 inactivation by Clb2                |
| $ks_{n2,bf}$   | SBF-dependent Cln2 synthesis       | $kdp_{net}$      | Basal Net1 dephosphorylation             |
| $kd_{n2}$      | Cln2 degradation                   | $kdp_{net,14}$   | Net1 dephosphorylation by Cdc14          |
| $ks_{ki}$      | Basal CKI synthesis rate           | $kdp_{net,px}$   | Net1 dephosphorylation by PPX            |
| $ks_{ki,swi5}$ | Swi5-dependent CKI synthesis       | $kp_{net}$       | Basal Net1 phosphorylation               |
| $kd_{ki}$      | Degradation rate of CKI            | $kp_{net,b2}$    | Net1 phosphorylation by Clb2             |
| $kd_{kip}$     | Degradation rate of CKIP           | $kp_{net,en}$    | Net1 phosphorylation by MEN              |
| $kp_{ki,e}$    | CKI phosphorylation rate           | $kp_{net,15}$    | Net1 phosphorylation by Cdc15            |
| $e_{ki,n3}$    | CKI phosphorylation by Cln3        | $ka_{px}$        | Basal PPX activation                     |
| $e_{ki,k2}$    | CKI phosphorylation by Bck2        | $ki_{px}$        | Basal PPX inactivation                   |
| $e_{ki,n2}$    | CKI phosphorylation by Cln2        | $ki_{px,p1}$     | PPX inactivation by Esp1                 |
| $e_{ki,b5}$    | CKI phosphorylation by Clb5        | $ks_{pds}$       | Basal Pds1 synthesis                     |
| $e_{ki,b2}$    | CKI phosphorylation by Clb2        | $kd_{pds}$       | Basal Pds1 degradation                   |
| $kdp_{ki}$     | Basal dephosphorylation of CKI     | $kd_{pds,20}$    | Pds1 degradation by Cdc20A               |
| $kdp_{ki,14}$  | CKI dephosphorylation by Cdc14     | $kd_{pds,20,i}$  | Pds1 degradation by Cdc20                |
| $ks_{b5}$      | Basal Clb5 synthesis               | $ka_{15}$        | Basal Cdc15 activation                   |
| $ks_{b5,bf}$   | SBF-dependent Clb5 synthesis       | $ka_{15,14}$     | Cdc15 activation by Cdc14                |
| $kd_{b5}$      | Basal Clb5 degradation             | $ki_{15}$        | Basal Cdc15 inactivation                 |
| $kd_{b5,20}$   | Clb5 degradation by Cdc20A         | $ki_{15,b2}$     | Cdc15 inactivation by Clb2               |
| $ks_{b2}$      | Basal Clb2 synthesis               | $ka_{tem}$       | Basal Tem1 activation                    |
| $ks_{b2,m1}$   | Mcm1-dependent Clb2 synthesis      | $ka_{tem,lo}$    | Tem1 activation by Polo                  |
| $kd_{b2}$      | Basal Clb2 degradation             | $ka_{tem,p1}$    | Tem1 activation by Esp1                  |
| $kd_{b2,20}$   | Clb2 degradation by Cdc20A         | $ki_{tem}$       | Basal inactivation of Tem1               |
| $kd_{b2,h1}$   | Clb2 degradation by Cdh1A          | $ki_{tem,px}$    | Tem1 inactivation by PPX                 |

Continued on next page

Table S1 – Continued from previous page

| Parameter      | Description                   | Parameter    | Description                                       |
|----------------|-------------------------------|--------------|---------------------------------------------------|
| $ks_{bud,e}$   | Time scale for BUD synthesis  | $ks_{lo}$    | Basal Polo synthesis                              |
| $ebud,n3$      | Cln3 activation of BUD        | $ks_{lo,m1}$ | Mcm1-dependent synthesis of Polo                  |
| $ebud,n2$      | Cln2 activation of BUD        | $kd_{lo}$    | Basal Polo degradation                            |
| $ebud,b5$      | Clb5 activation of BUD        | $kd_{lo,h1}$ | Polo degradation by Cdh1                          |
| $ebud,b2$      | Clb2 activation of BUD        | $ka_{lo}$    | Basal Polo activation                             |
| $kd_{bud}$     | BUD degradation               | $ka_{lo,b2}$ | Polo activation by Clb2                           |
| $ks_{spn}$     | SPN synthesis                 | $ki_{lo}$    | Basal Polo inactivation                           |
| $kd_{spn}$     | SPN degradation               | $kas_{net}$  | Efficiency of Cdc14-Net1 complex (RENT) formation |
| $J_{spn}$      | SPN synthesis threshold       | f            | Fraction of mass retained by daughter at division |
| $ks_{ori,e}$   | Time scale for ORI synthesis  | MDT          | Mass doubling time                                |
| $e_{ori,b5}$   | Clb5 activation of ORI        | $Whi5_T$     | Total Whi5                                        |
| $e_{ori,b2}$   | Clb2 activation of ORI        | $SBF_T$      | Total SBF                                         |
| $kd_{ori}$     | Degradation of ORI            | $Mcm1_T$     | Total Mcm1                                        |
| $ks_{swi5}$    | Basal Swi5 synthesis          | $APC_T$      | Total APC                                         |
| $ks_{swi5,m1}$ | Mcm1-dependent Swi5 synthesis | $Cdh1_T$     | Total Cdh1                                        |
|                |                               | $Net1_T$     | Total Net1                                        |
|                |                               | $Cdc14_T$    | Total Cdc14                                       |
|                |                               | $PPX_T$      | Total PPX                                         |
|                |                               | $Esp1_T$     | Total Esp1                                        |
|                |                               | $Cdc15_T$    | Total Cdc15                                       |
|                |                               | $Tem1_T$     | Total Tem1                                        |

Table S2: Model variables

| Variable              | Description                                                                             |
|-----------------------|-----------------------------------------------------------------------------------------|
| V                     | Cell size                                                                               |
| [Cln3]                | Concentration of G1 cyclin Cln3                                                         |
| [Bck2]                | Concentration of Bck2, an activator for START transition                                |
| [WHI5dep]             | Dephosphorylated (active) Whi5                                                          |
| [SBFdep]              | Dephosphorylated SBF                                                                    |
| [Cln2]                | Total concentration of G1 cyclins Cln1,2                                                |
| [CKI <sub>T</sub> ]   | Total concentration of Sic1+Cdc6, stoichiometric inhibitors of Clb5,6 and Clb1,2        |
| [CKI <sub>P</sub> ]   | Phosphorylated form of Sic1+Cdc6, stoichiometric inhibitors of Clb5,6 and Clb1,2        |
| [Clb5 <sub>T</sub> ]  | Total concentration of free B cyclins Clb5,6                                            |
| [Clb2 <sub>T</sub> ]  | Total concentration of free B cyclins Clb1,2                                            |
| [BUD]                 | Variable for bud emergence progression                                                  |
| [ORI]                 | Variable for DNA synthesis progression                                                  |
| [SPN]                 | Variable for spindle assembly progression                                               |
| [Swi5 <sub>T</sub> ]  | Total concentration of SWI5, transcription factor for CKI synthesis                     |
| [CDC20 <sub>T</sub> ] | Total concentration of Cdc20, a protein involved in Clb5,6, Clb1,2 and Pds1 degradation |
| [APCP]                | Phosphorylated (active) APC, activates Cdc20 by complex formation                       |
| [Cdh1 <sub>A</sub> ]  | Active Cdh1 degrading Clb1,2 and Polo kinase                                            |
| [Net1dep]             | Dephosphorylated (active) Net1, a stoichiometric inhibitor of Cdc14                     |
| [PPX]                 | Phosphatase that dephosphorylates Net1                                                  |
| [Pds1 <sub>T</sub> ]  | Securin, Esp1's stoichiometric inhibitor                                                |
| [Cdc15]               | Kinase, when complexed with Tem1, phosphorylates Net1                                   |
| [Tem1]                | Protein, when complexed with Cdc15, phosphorylates Net1                                 |
| [Polo <sub>T</sub> ]  | Total concentration of Polo kinase that activates Tem1                                  |
| [Polo <sub>A</sub> ]  | Concentration of phosphorylated (active) Polo kinase that activates Tem1                |
| [Cdc20A-APC]          | Complex formed from active Cdc20 and APC                                                |
| [Cdc20A-APCP]         | Complex formed from active Cdc20 and APC-P                                              |

Initial values of these variables in the wild type (glucose) simulations are also optimized with the model parameters. Each variable corresponds to a single ODE.

Table S3: Initial values (“TL set”), optimal values and optimal ranges of model parameters

| Parameter      | Initial value | Optimal value (range)    | Parameter        | Initial value | Optimal value (range)     |
|----------------|---------------|--------------------------|------------------|---------------|---------------------------|
| $\gamma$       | 1             | 0.4902 (0.4560–0.4925)   | $kd_{swi5}$      | 0.08          | 0.1017 (0.1012–0.1027)    |
| $\gamma_{ki}$  | 10            | 10.4240 (4.1816–18.9217) | $ka_{swi5,14}$   | 2             | 1.4203 (0.5683–2.5625)    |
| $\gamma_{cp}$  | 1             | 0.5495 (0.5249–0.5576)   | $ki_{swi5,b2}$   | 0.05          | 0.0456 (0–0.0820)         |
| $\gamma_{tem}$ | 1             | 0.6599 (0.5258–0.9239)   | $ka_{m1,b2}$     | 10            | 11.1777 (11.1736–13.4084) |
| $\sigma$       | 10            | 9.9996 (9.9596–10.2929)  | $ki_{m1}$        | 1             | 1.2121 (1.1765–1.3243)    |
| $\sigma_{net}$ | 10            | 11.4240 (9.1481–20.6561) | $ks_{20}$        | 0.006         | 0.0087 (0.0067–0.0155)    |
| $ks_{n3}$      | 1.5           | 0.8110 (0.8104–0.8125)   | $ks_{20,m1}$     | 0.6           | 0.6643 (0.6606–0.6662)    |
| $J_{n3}$       | 6             | 5.3729 (5.3398–5.3947)   | $kd_{20}$        | 0.3           | 0.2687 (0.2677–0.2700)    |
| $D_{n3}$       | 1             | 0.6792 (0.6775–0.7879)   | $ka_{20}$        | 0.1           | 0.0816 (0.0651–0.0980)    |
| $kd_{n3}$      | 3             | 3.0713 (3.0653–3.0762)   | $kd_{b5,20,i}$   | 0.012         | 0.0161 (0.0064–0.0257)    |
| $ks_{k2}$      | 0.1350        | 0.1651 (0.1649–0.1652)   | $kd_{clb2,20,i}$ | 0.032         | 0.0323 (0.0321–0.0323)    |
| $kd_{k2}$      | 2.5           | 2.3281 (2.3133–2.3372)   | $ki_{20,ori}$    | 8             | 8.0846 (1.6034–14.5784)   |
| $kdp_{i5}$     | 1             | 0.6832 (0.6727–0.6842)   | $ka_{cp,b2}$     | 1             | 1.3485 (1.3469–1.3928)    |
| $kdp_{i5,14}$  | 0.1           | 0.1429 (0.0856–0.2576)   | $ki_{cp}$        | 1             | 1.0923 (1.0899–1.0926)    |
| $kp_{i5}$      | 0.1           | 0.1145 (0.1083–0.1157)   | $ka_{h1}$        | 1             | 1.0709 (1.0577–1.2707)    |
| $kp_{i5,n3}$   | 6             | 8.0298 (8.0204–8.0333)   | $ka_{h1,14}$     | 7.5           | 6.8649 (6.8336–6.8679)    |
| $kp_{i5,k2}$   | 6             | 6.0771 (6.0205–6.0881)   | $ki_{h1}$        | 0.1           | 0.1284 (0–0.2317)         |
| $kp_{i5,n2}$   | 15            | 10.2359 (1.9094–15.4576) | $ki_{h1,e}$      | 1             | 1.3698 (1.3696–1.3702)    |
| $kp_{i5,b5}$   | 0.1           | 0.0628 (0–0.1137)        | $e_{h1,n3}$      | 0.25          | 0.3868 (0–0.7687)         |
| $kdp_{bf}$     | 1             | 0.8169 (0.6551–0.8227)   | $e_{h1,n2}$      | 0.7           | 0.6046 (0.4828–0.8434)    |
| $kp_{b,fb2}$   | 8             | 9.2818 (9.2483–11.1022)  | $e_{h1,b5}$      | 7             | 7.1387 (5.7060–8.7046)    |
| $ks_{n2}$      | 0             | 0 (fixed)                | $e_{h1,b2}$      | 8             | 6.7021 (6.6694–6.7065)    |
| $ks_{n2,bf}$   | 0.5           | 0.5141 (0.5129–0.5336)   | $kdp_{net}$      | 1             | 0.7886 (0.7766–0.8026)    |
| $kd_{n2}$      | 0.25          | 0.3394 (0.3391–0.4755)   | $kdp_{net,14}$   | 0.1           | 0.0672 (0–0.1074)         |
| $ks_{ki}$      | 0.0120        | 0.0082 (0.0081–0.0097)   | $kdp_{net,px}$   | 10            | 9.9244 (8.4678–12.7017)   |
| $ks_{ki,swi5}$ | 0.12          | 0.0962 (0.0910–0.0962)   | $kp_{net}$       | 0.1           | 0.1327 (0.0265–0.2123)    |
| $kd_{ki}$      | 0.01          | 0.0155 (0.0154–0.0155)   | $kp_{net,b2}$    | 1             | 0.9967 (0.9958–1.0238)    |
| $kd_{kip}$     | 2             | 1.6428 (1.3143–2.2999)   | $kp_{net,en}$    | 10            | 8.1639 (3.2568–14.9003)   |
| $kp_{ki,e}$    | 1             | 1.0393 (1.0276–1.0408)   | $kp_{net,15}$    | 0.05          | 0.0601 (0.0240–0.1082)    |
| $e_{ki,n3}$    | 2.5           | 2.1528 (0–3.0160)        | $ka_{px}$        | 1             | 0.6471 (0.6467–0.7798)    |
| $e_{ki,k2}$    | 0.5           | 0.7061 (0–1.0993)        | $ki_{px}$        | 0.1           | 0.1289 (0–0.2386)         |
| $e_{ki,n2}$    | 1             | 1.0313 (0.8247–1.0330)   | $ki_{px,p1}$     | 3             | 3.3649 (3.3577–4.0812)    |
| $e_{ki,b5}$    | 3             | 2.3303 (0.9314–2.8124)   | $ks_{pds}$       | 0.03          | 0.0306 (0.0245–0.0427)    |
| $e_{ki,b2}$    | 4             | 2.0135 (1.6187–2.0234)   | $kd_{pds}$       | 0.05          | 0.0355 (0.0071–0.0638)    |
| $kdp_{ki}$     | 1             | 0.8285 (0.8149–0.8285)   | $kd_{pds,20}$    | 3             | 2.4469 (1.4687–3.9250)    |
| $kdp_{ki,14}$  | 7             | 3.2185 (2.7115–3.8867)   | $kd_{pds,20,i}$  | 0.3           | 0.3639 (0.2895–0.6581)    |
| $ks_{b5}$      | 0.0016        | 0.0024 (0.0019–0.0024)   | $ka_{15}$        | 0.1           | 0.0858 (0–0.1547)         |
| $ks_{b5,bf}$   | 0.01          | 0.0110 (0.0087–0.0131)   | $ka_{15,14}$     | 5             | 4.5132 (2.7229–8.1686)    |
| $kd_{b5}$      | 0.01          | 0.0053 (0.0052–0.0076)   | $ki_{15}$        | 1             | 0.7061 (0.2770–1.1839)    |
| $kd_{b5,20}$   | 0.16          | 0.1488 (0.1479–0.1788)   | $ki_{15,b2}$     | 1             | 0.6324 (0–1.2013)         |
| $ks_{b2}$      | 0.0020        | 0.0029 (0.0029–0.0029)   | $ka_{tem}$       | 0.1           | 0.1156 (0–0.2089)         |
| $ks_{b2,m1}$   | 0.15          | 0.1039 (0.1037–0.1041)   | $ka_{tem,lo}$    | 2             | 2.4371 (1.4611–4.3845)    |
| $kd_{b2}$      | 0.003         | 0.0024 (0.0014–0.0028)   | $ka_{tem,p1}$    | 0.1           | 0.1158 (0–0.2212)         |

Continued on next page

Table S3 – Continued from previous page

| Parameter      | Initial value | Optimal value (range)  | Parameter    | Initial value | Optimal value (range)     |
|----------------|---------------|------------------------|--------------|---------------|---------------------------|
| $kd_{b2,20}$   | 0.09          | 0.1215 (0.1215–0.1219) | $kitem$      | 1             | 0.8710 (0.6953–1.5641)    |
| $kd_{b2,h1}$   | 0.4           | 0.5225 (0.4185–0.5243) | $kitem,px$   | 2             | 1.9067 (0–3.6236)         |
| $ks_{bud,e}$   | 0.2           | 0.2073 (0–0.3733)      | $ks_{lo}$    | 0.01          | 0.0110 (0–0.0207)         |
| $e_{bud,n3}$   | 0.05          | 0.0502 (0–0.0910)      | $ks_{lo,m1}$ | 0.1           | 0.1023 (0.0413–0.1938)    |
| $e_{bud,n2}$   | 0.25          | 0.3263 (0–0.5888)      | $kd_{lo}$    | 0.01          | 0.0133 (0–0.0233)         |
| $e_{bud,b5}$   | 1             | 0.8492 (0–1.5286)      | $kd_{lo,h1}$ | 0.03          | 0.0377 (0–0.0678)         |
| $e_{bud,b2}$   | 0.1           | 0.0597 (0–0.1097)      | $ka_{lo}$    | 0.1           | 0.0644 (0–0.1158)         |
| $kd_{bud}$     | 0.06          | 0.0868 (0–0.1575)      | $ka_{lo,b2}$ | 3             | 3.0066 (2.9704–3.1893)    |
| $ks_{spn}$     | 0.1           | 0.1399 (0.1385–0.1413) | $ki_{lo}$    | 1             | 1.6499 (1.5454–1.8544)    |
| $kd_{spn}$     | 0.06          | 0.0584 (0.0470–0.0700) | $kas_{net}$  | 1             | 1.2550 (1.2516–1.2579)    |
| $J_{spn}$      | 0.14          | 0.1041 (0.1016–0.1251) | f            | 0.4           | 0.4 (fixed)               |
| $ks_{ori,e}$   | 2             | 2.4029 (1.4357–3.3643) | MDT          | 100           | 100 (fixed)               |
| $e_{ori,b5}$   | 0.9           | 0.7772 (0.4596–1.4075) | $Whi5_T$     | 3             | 2.4731 (2.4319–2.4831)    |
| $e_{ori,b2}$   | 0.45          | 0.5988 (0.2395–0.9579) | $SBF_T$      | 1             | 1.0882 (1.0771–1.0971)    |
| $kd_{ori}$     | 0.06          | 0.0502 (0–0.0904)      | $Mcm1_T$     | 1             | 0.7003 (0.6931–0.7046)    |
| $ks_{swi5}$    | 0.0050        | 0.0045 (0.0027–0.0063) | $APC_T$      | 25            | 34.8950 (27.8941–41.9203) |
| $ks_{swi5,m1}$ | 0.08          | 0.1029 (0.1022–0.1030) | $Cdh1_T$     | 1             | 1.2356 (1.2330–1.2440)    |
|                |               |                        | $Net1_T$     | 3             | 3.0336 (2.9878–3.0344)    |
|                |               |                        | $Cdc14_T$    | 2             | 2.0512 (2.0441–2.0530)    |
|                |               |                        | $PPX_T$      | 1             | 1.1085 (0.8870–1.5520)    |
|                |               |                        | $Esp1_T$     | 0.5           | 0.3851 (0.3850–0.3858)    |
|                |               |                        | $Cdc15_T$    | 1             | 0.8228 (0.3292–1.4830)    |
|                |               |                        | $Tem1_T$     | 1             | 1.4117 (0.8446–2.6806)    |

Initial values are from the “TL set” described in the main text. Optimal values come from averaging 3415 sets of parameter values that captured 111 phenotypes in the most optimal DE run, whereas the optimal ranges are computed from the 8158 sets of parameter values (that also capture the same 111 phenotypes) generated during sensitivity analysis.

Table S4: Initial values (“TL set”), optimal values and optimal ranges of initial conditions

| Variable          | Initial value | Optimal value (range)  |
|-------------------|---------------|------------------------|
| $V_0$             | 1.25          | 1.0809 (0.1783–2.3025) |
| $[Cln3]_0$        | 0.18          | 0.2545 (0–0.4590)      |
| $[Bck2]_0$        | 0.066         | 0.0855 (0–0.1556)      |
| $[WHI5dep]_0$     | 2.02          | 3.2035 (0–6.2711)      |
| $[SBFdep]_0$      | 0.99          | 1.0392 (0–1.8962)      |
| $[Cln2]_0$        | 0.1           | 0.1198 (0–0.2219)      |
| $[CKI_T]_0$       | 1.05          | 1.2733 (0–2.5036)      |
| $[CKI_P]_0$       | 0.1           | 0.1089 (0–0.1979)      |
| $[Clb5_T]_0$      | 0.29          | 0.2875 (0–0.5203)      |
| $[Clb2_T]_0$      | 0.1           | 0.1297 (0–0.2334)      |
| $[BUD]_0$         | 0.05          | 0.0226 (0–0.0407)      |
| $[ORI]_0$         | 0.1           | 0.0865 (0–0.1800)      |
| $[SPN]_0$         | 0.11          | 0.1057 (0–0.1929)      |
| $[Swi5_T]_0$      | 0.21          | 0.1841 (0–0.3416)      |
| $[CDC20_T]_0$     | 0.02          | 0.0214 (0–0.0387)      |
| $[APCP]_0$        | 0.1           | 0.0822 (0–0.1794)      |
| $[Cdh1_A]_0$      | 1             | 1.0981 (0–1.9855)      |
| $[Net1dep]_0$     | 2.7           | 2.4698 (0–4.4491)      |
| $[PPX]_0$         | 0.87          | 1.0024 (0–1.8045)      |
| $[Pds1_T]_0$      | 0.24          | 0.2686 (0–0.4877)      |
| $[Cdc15]_0$       | 0.1           | 0.1044 (0–0.1967)      |
| $[Tem1]_0$        | 0.1           | 0.0922 (0–0.1836)      |
| $[Polo_T]_0$      | 0.67          | 0.9371 (0–1.7368)      |
| $[Polo_A]_0$      | 0.1           | 0.0884 (0–0.1591)      |
| $[Cdc20A-APC]_0$  | 0.1           | 0.1121 (0–0.2020)      |
| $[Cdc20A-APCP]_0$ | 0.1           | 0.0922 (0–0.1667)      |

Initial values are referred to as the “TL set” in the main text. Optimal values come from averaging 3415 sets of parameter values that captured 111 phenotypes in the most optimal DE run, whereas the optimal ranges originate from the 8158 sets of parameter values (that also capture the same 111 phenotypes) generated during sensitivity analysis.

Table S5: List of 119 phenotypes

| Phenotype # | Phenotype name                                                            | Viable/Inviable | Changes in WT parameters                                                                                                         |
|-------------|---------------------------------------------------------------------------|-----------------|----------------------------------------------------------------------------------------------------------------------------------|
| 1           | WT in glucose                                                             | Viable          | NONE                                                                                                                             |
| 2           | WT in galactose                                                           | Viable          | MDT=150; f=0.48;                                                                                                                 |
| 3           | <i>cln3</i> Δ                                                             | Viable          | $D_{n3}=0$ ; [CLN3]=0;                                                                                                           |
| 4           | <i>bck2</i> Δ                                                             | Viable          | $ks_{k2}=0$ ; [BCK2]=0;                                                                                                          |
| 5           | <i>cln3</i> Δ <i>bck2</i> Δ                                               | Inviable        | $D_{n3}=0$ ; [CLN3]=0; $ks_{k2}=0$ ; [BCK2]=0;                                                                                   |
| 6           | <i>cln3</i> Δ <i>bck2</i> Δ multicopy <i>CLN2</i>                         | Inviable        | $D_{n3}=0$ ; [CLN3]=0; $ks_{k2}=0$ ; [BCK2]=0;<br>$ks_{n2bf}=ks_{n2bf}^*2$ ;                                                     |
| 7           | <i>cln3</i> Δ <i>bck2</i> Δ <i>sic1</i> Δ                                 | Inviable        | $D_{n3}=0$ ; [CLN3]=0; $ks_{k2}=0$ ; [BCK2]=0;<br>$ks_{ki}=ks_{ki}^*0.125$ ; $ks_{ki,swi5}=ks_{ki,swi5}^*0.125$ ;<br>[CKIT]=0.2; |
| 8           | <i>cln3</i> Δ <i>bck2</i> Δ <i>whi5</i> Δ                                 | Viable          | $D_{n3}=0$ ; [CLN3]=0; $ks_{k2}=0$ ; [BCK2]=0;<br>WHI5T=0; [WHI5A]=0;                                                            |
| 9           | <i>GAL-CLN3</i>                                                           | Viable          | MDT=150; f=0.48; $D_{n3}=D_{n3}^*20$ ;                                                                                           |
| 10          | Multicopy <i>BCK2</i>                                                     | Viable          | $ks_{k2}=ks_{k2}^*17$ ;                                                                                                          |
| 11          | <i>cln1</i> Δ <i>cln2</i> Δ                                               | Viable          | $ks_{n2}=0$ ; $ks_{n2bf}=0$ ; [CLN2]=0;                                                                                          |
| 12          | <i>cln1</i> Δ <i>cln2</i> Δ <i>bck2</i> Δ                                 | Viable          | $ks_{n2}=0$ ; $ks_{n2bf}=0$ ; [CLN2]=0;<br>$ks_{k2}=0$ ; [BCK2]=0;                                                               |
| 13          | <i>cln1</i> Δ <i>cln2</i> Δ <i>sic1</i> Δ                                 | Viable          | $ks_{n2}=0$ ; $ks_{n2bf}=0$ ; [CLN2]=0;<br>$ks_{ki}=ks_{ki}^*0.125$ ; $ks_{ki,swi5}=ks_{ki,swi5}^*0.125$ ;<br>[CKIT]=0.2;        |
| 14          | <i>cln1</i> Δ <i>cln2</i> Δ <i>cki</i> Δ                                  | Viable          | $ks_{n2}=0$ ; $ks_{n2bf}=0$ ; [CLN2]=0;<br>$ks_{ki}=0$ ; $ks_{ki,swi5}=0$ ; [CKIT]=0; [CKIP]=0;                                  |
| 15          | <i>cln1</i> Δ <i>cln2</i> Δ <i>GAL-SIC1</i>                               | Inviable        | $ks_{n2}=0$ ; $ks_{n2bf}=0$ ; [CLN2]=0;<br>MDT=150; f=0.48; $ks_{ki}=ks_{ki}^*33.33$ ;                                           |
| 16          | <i>cln1</i> Δ <i>cln2</i> Δ <i>GAL-CLN2</i>                               | Viable          | $ks_{n2bf}=0$ ;<br>MDT=150; f=0.48; $ks_{n2}=0.15$ ;                                                                             |
| 17          | <i>cln1</i> Δ <i>cln2</i> Δ <i>GAL-SIC1</i> <i>GAL-CLN2</i>               | Viable          | $ks_{n2bf}=0$ ;<br>MDT=150; f=0.48; $ks_{n2}=0.15$ ;<br>$ks_{ki}=ks_{ki}^*33.33$ ;                                               |
| 18          | <i>cln1</i> Δ <i>cln2</i> Δ <i>cdh1</i> Δ                                 | Viable          | $ks_{n2}=0$ ; $ks_{n2bf}=0$ ; [CLN2]=0;<br>CDH1T=0; [CDH1A]=0;                                                                   |
| 19          | <i>cln1</i> Δ <i>cln2</i> Δ <i>cdh1</i> Δ <i>GAL-SIC1</i>                 | Inviable        | $ks_{n2}=0$ ; $ks_{n2bf}=0$ ; [CLN2]=0;<br>CDH1T=0; [CDH1A]=0;<br>MDT=150; f=0.48; $ks_{ki}=ks_{ki}^*33.33$ ;                    |
| 20          | <i>cln1</i> Δ <i>cln2</i> Δ <i>cdh1</i> Δ <i>GAL-CLN2</i>                 | Viable          | $ks_{n2bf}=0$ ;<br>CDH1T=0; [CDH1A]=0;<br>MDT=150; f=0.48; $ks_{n2}=0.15$ ;                                                      |
| 21          | <i>cln1</i> Δ <i>cln2</i> Δ <i>cdh1</i> Δ <i>GAL-SIC1</i> <i>GAL-CLN2</i> | Viable          | $ks_{n2bf}=0$ ;<br>CDH1T=0; [CDH1A]=0;<br>MDT=150; f=0.48; $ks_{n2}=0.15$ ;<br>$ks_{ki}=ks_{ki}^*33.33$ ;                        |
| 22          | <i>cln1</i> Δ <i>cln2</i> Δ <i>cln3</i> Δ                                 | Inviable        | $ks_{n2}=0$ ; $ks_{n2bf}=0$ ; [CLN2]=0;<br>$D_{n3}=0$ ; [CLN3]=0;                                                                |
| 23          | <i>cln1</i> Δ <i>cln2</i> Δ <i>cln3</i> Δ <i>GAL-CLN2</i>                 | Viable          | $ks_{n2bf}=0$ ;<br>$D_{n3}=0$ ; [CLN3]=0;<br>MDT=150; f=0.48; $ks_{n2}=0.15$ ;                                                   |

Continued on next page

Table S5 – Continued from previous page

| Phenotype # | Phenotype name                          | Viable/Inviable | Changes in WT parameters                                                                                                                 |
|-------------|-----------------------------------------|-----------------|------------------------------------------------------------------------------------------------------------------------------------------|
| 24          | <i>cln1Δ cln2Δ cln3Δ GAL-CLN3</i>       | Viable          | $ks_{n2}=0; ks_{n2bf}=0; [CLN2]=0;$<br>MDT=150; f=0.48; $D_{n3}=D_{n3}*20;$                                                              |
| 25          | <i>cln1Δ cln2Δ cln3Δ sicΔ</i>           | Viable          | $ks_{n2}=0; ks_{n2bf}=0; [CLN2]=0;$<br>$D_{n3}=0; [CLN3]=0;$<br>$ks_{ki}=ks_{ki}*0.125; ks_{ki,swi5}=ks_{ki,swi5}*0.125;$<br>[CKIT]=0.2; |
| 26          | <i>cln1Δ cln2Δ cln3Δ multicopy BCK2</i> | Viable          | $ks_{n2}=0; ks_{n2bf}=0; [CLN2]=0;$<br>$D_{n3}=0; [CLN3]=0;$<br>$ks_{k2}=ks_{k2}*17;$                                                    |
| 27          | <i>cln1Δ cln2Δ cln3Δ bck2Δ GAL-CLN2</i> | Viable          | $ks_{n2bf}=0;$<br>$D_{n3}=0; [CLN3]=0;$<br>$ks_{k2}=0; [BCK2]=0;$<br>MDT=150; f=0.48; $ks_{n2}=0.15;$                                    |
| 28          | <i>cln1Δ cln2Δ cln3Δ multicopy CLB5</i> | Viable          | $ks_{n2}=0; ks_{n2bf}=0; [CLN2]=0;$<br>$D_{n3}=0; [CLN3]=0;$<br>$ks_{b5}=ks_{b5}*5.33; ks_{b5,bf}=ks_{b5,bf}*5.33;$                      |
| 29          | <i>cln1Δ cln2Δ cln3Δ GAL-CLB5</i>       | Viable          | $ks_{n2}=0; ks_{n2bf}=0; [CLN2]=0;$<br>$D_{n3}=0; [CLN3]=0;$<br>MDT=150; f=0.48; $ks_{b5}=0.04;$                                         |
| 30          | <i>cln1Δ cln2Δ cln3Δ GAL-CLB2</i>       | Inviable        | $ks_{n2}=0; ks_{n2bf}=0; [CLN2]=0;$<br>$D_{n3}=0; [CLN3]=0;$<br>MDT=150; f=0.48; $ks_{b2}=ks_{b2}*49.40;$                                |
| 31          | <i>cln1Δ cln2Δ cln3Δ cdh1Δ</i>          | Inviable        | $ks_{n2}=0; ks_{n2bf}=0; [CLN2]=0;$<br>$D_{n3}=0; [CLN3]=0;$<br>CDH1T=0; [CDH1A]=0;                                                      |
| 32          | <i>cln2Δ cln3Δ apc-ts</i>               | Inviable        | $ks_{n2}=0; ks_{n2bf}=0; [CLN2]=0;$<br>$D_{n3}=0; [CLN3]=0;$<br>$ks_{20}=0; ks_{20,m1}=0; CDH1T=0; [CDH1A]=0;$                           |
| 33          | <i>cdh1Δ</i>                            | Viable          | CDH1T=0; [CDH1A]=0;                                                                                                                      |
| 34          | <i>CDH1</i> constitutively active       | Inviable        | CDH1T=CDH1T*3; $ki_{h1,e}=0;$                                                                                                            |
| 35          | <i>sic1Δ</i>                            | Viable          | $ks_{ki}=ks_{ki}*0.125; ks_{ki,swi5}=ks_{ki,swi5}*0.125;$<br>[CKIT]=0.2;                                                                 |
| 36          | <i>GAL-SIC1</i>                         | Viable          | MDT=150; f=0.48; $ks_{ki}=ks_{ki}*33.33;$                                                                                                |
| 37          | <i>GAL-SIC1-dbΔ</i>                     | Inviable        | MDT=150; f=0.48; $ks_{ki}=ks_{ki}*33.33; kd_{kip}=0;$                                                                                    |
| 38          | <i>sic1Δ cdc6Δ (ckiΔ)</i>               | Viable          | $ks_{ki}=0; ks_{ki,swi5}=0; [CKIT]=0; [CKIP]=0;$                                                                                         |
| 39          | <i>swi5Δ</i>                            | Viable          | $ks_{swi5}=0; ks_{swi5,m1}=0; [SWI5T]=0;$                                                                                                |
| 40          | <i>sic1Δ cdc6Δ2-49 cdh1Δ</i>            | Inviable        | $ks_{ki}=0; ks_{ki,swi5}=0; [CKIT]=0; [CKIP]=0;$<br>CDH1T=0; [CDH1A]=0;                                                                  |
| 41          | <i>swi5Δ cdh1Δ</i>                      | Inviable        | $ks_{swi5}=0; ks_{swi5,m1}=0; [SWI5T]=0;$<br>CDH1T=0; [CDH1A]=0;                                                                         |
| 42          | <i>swi5Δ cdh1Δ GAL-SIC1</i>             | Viable          | $ks_{swi5}=0; ks_{swi5,m1}=0; [SWI5T]=0;$<br>CDH1T=0; [CDH1A]=0;<br>MDT=150; f=0.48; $ks_{ki}=ks_{ki}*33.33;$                            |
| 43          | <i>clb5Δ clb6Δ</i>                      | Viable          | $ks_{b5}=0; ks_{b5,bf}=0; [CLB5T]=0;$                                                                                                    |
| 44          | <i>clb5Δ clb6Δ cln1Δ cln2Δ</i>          | Inviable        | $ks_{b5}=0; ks_{b5,bf}=0; [CLB5T]=0;$<br>$ks_{n2}=0; ks_{n2bf}=0; [CLN2]=0;$                                                             |
| 45          | <i>CLB5-dbΔ</i>                         | Viable          | $kd_{b5,20}=0; kd_{b5,20,i}=0;$                                                                                                          |

Continued on next page



Table S5 – Continued from previous page

| Phenotype # | Phenotype name                           | Viable/Inviable | Changes in WT parameters                                                                                                 |
|-------------|------------------------------------------|-----------------|--------------------------------------------------------------------------------------------------------------------------|
| 46          | <i>CLB5-dbΔ sic1Δ</i>                    | Inviable        | $kd_{b5,20}=0; kd_{b5,20,i}=0;$<br>$ks_{ki}=ks_{ki}*0.125; ks_{ki,swi5}=ks_{ki,swi5}*0.125;$<br>[CKIT]=0.2;              |
| 47          | <i>GAL-CLB5</i>                          | Viable          | MDT=150; f=0.48; $ks_{b5}=0.04;$                                                                                         |
| 48          | <i>GAL-CLB5 sic1Δ</i>                    | Inviable        | MDT=150; f=0.48; $ks_{b5}=0.04;$<br>$ks_{ki}=ks_{ki}*0.125; ks_{ki,swi5}=ks_{ki,swi5}*0.125;$<br>[CKIT]=0.2;             |
| 49          | <i>GAL-CLB5 cdh1Δ</i>                    | Inviable        | MDT=150; f=0.48; $ks_{b5}=0.04;$<br>CDH1T=0; [CDH1A]=0;                                                                  |
| 50          | <i>GAL-CLB5-dbΔ</i>                      | Inviable        | MDT=150; f=0.48; $ks_{b5}=0.04; kd_{b5,20}=0; kd_{b5,20,i}=0;$                                                           |
| 51          | <i>clb1Δ clb2Δ</i>                       | Inviable        | $ks_{b2}=0; ks_{b2,m1}=0; [CLB2T]=0;$                                                                                    |
| 52          | <i>clb1Δ clb2Δ clb5Δ clb6Δ</i>           | Inviable        | $ks_{b2}=0; ks_{b2,m1}=0; [CLB2T]=0;$<br>$ks_{b5}=0; ks_{b5,bf}=0; [CLB5T]=0;$                                           |
| 53          | <i>GAL-CLB2</i>                          | Viable          | MDT=150; f=0.48; $ks_{b2}=ks_{b2}*49.40;$                                                                                |
| 54          | Multicopy <i>GAL-CLB2</i>                | Inviable        | MDT=150; f=0.48; $ks_{b2}=ks_{b2}*242.42;$                                                                               |
| 55          | <i>GAL-CLB2 sic1Δ</i>                    | Inviable        | MDT=150; f=0.48; $ks_{b2}=ks_{b2}*49.40;$<br>$ks_{ki}=ks_{ki}*0.125; ks_{ki,swi5}=ks_{ki,swi5}*0.125;$<br>[CKIT]=0.2;    |
| 56          | <i>GAL-CLB2 cdh1Δ</i>                    | Inviable        | MDT=150; f=0.48; $ks_{b2}=ks_{b2}*49.40;$<br>CDH1T=0; [CDH1A]=0;                                                         |
| 57          | <i>GAL-CLB2 swi5Δ</i>                    | Inviable        | MDT=150; f=0.48; $ks_{b2}=ks_{b2}*49.40;$<br>$ks_{swi5}=0; ks_{swi5,m1}=0; [SWI5T]=0;$                                   |
| 58          | <i>CLB2-dbΔ</i>                          | Inviable        | $kd_{b2,20}=0; kd_{b2,h1}=kd_{b2,h1}*0.09; kd_{b2,20,i}=0;$                                                              |
| 59          | <i>CLB2-dbΔ</i> in galactose             | Inviable        | $kd_{b2,20}=0; kd_{b2,h1}=kd_{b2,h1}*0.09; kd_{b2,20,i}=0;$<br>MDT=150; f=0.48;                                          |
| 60          | <i>CLB2-dbΔ GAL-SIC1</i>                 | Viable          | $kd_{b2,20}=0; kd_{b2,h1}=kd_{b2,h1}*0.09; kd_{b2,20,i}=0;$<br>MDT=150; f=0.48; $ks_{ki}=ks_{ki}*33.33;$                 |
| 61          | <i>CLB2-dbΔ</i> multicopy <i>SIC1</i>    | Viable          | $kd_{b2,20}=0; kd_{b2,h1}=kd_{b2,h1}*0.09; kd_{b2,20,i}=0;$<br>$ks_{ki}=ks_{ki}*65; ks_{ki,swi5}=ks_{ki,swi5}*65;$       |
| 62          | <i>CLB2-dbΔ clb5Δ clb6Δ</i>              | Inviable        | $kd_{b2,20}=0; kd_{b2,h1}=kd_{b2,h1}*0.09; kd_{b2,20,i}=0;$<br>$ks_{b5}=0; ks_{b5,bf}=0; [CLB5T]=0;$                     |
| 63          | <i>CLB2-dbΔ clb5Δ clb6Δ</i> in galactose | Viable          | $kd_{b2,20}=0; kd_{b2,h1}=kd_{b2,h1}*0.09; kd_{b2,20,i}=0;$<br>$ks_{b5}=0; ks_{b5,bf}=0; [CLB5T]=0;$<br>MDT=150; f=0.48; |
| 64          | <i>GAL-CLB2-dbΔ</i>                      | Inviable        | $kd_{b2,20}=0; kd_{b2,h1}=kd_{b2,h1}*0.09; kd_{b2,20,i}=0;$<br>MDT=150; f=0.48; $ks_{b2}=ks_{b2}*49.40;$                 |
| 65          | <i>CLB1 clb2Δ</i>                        | Viable          | $ks_{b2}=ks_{b2}*0.33; ks_{b2,m1}=ks_{b2,m1}*0.33;$                                                                      |
| 66          | <i>CLB1 clb2Δ cdh1Δ</i>                  | Inviable        | $ks_{b2}=ks_{b2}*0.33; ks_{b2,m1}=ks_{b2,m1}*0.33;$<br>CDH1T=0; [CDH1A]=0;                                               |
| 67          | <i>CLB1 clb2Δ pds1Δ</i>                  | Inviable        | $ks_{b2}=ks_{b2}*0.33; ks_{b2,m1}=ks_{b2,m1}*0.33;$<br>$ks_{pds}=0; [PDS1T]=0;$                                          |
| 68          | <i>cdc20-ts (cdc20Δ)</i>                 | Inviable        | $ks_{20}=0; ks_{20,m1}=0; [CDC20T]=0; [CDC20A-APCP]=0;$                                                                  |
| 69          | <i>clb5Δ clb6Δ cdc20Δ</i>                | Inviable        | $ks_{b5}=0; ks_{b5,bf}=0; [CLB5T]=0;$<br>$ks_{20}=0; ks_{20,m1}=0; [CDC20T]=0; [CDC20A-APCP]=0;$                         |
| 70          | <i>cdc20Δ pds1Δ</i>                      | Inviable        | $ks_{20}=0; ks_{20,m1}=0; [CDC20T]=0; [CDC20A-APCP]=0;$<br>$ks_{pds}=0; [PDS1T]=0;$                                      |
| 71          | <i>clb5Δ clb6Δ cdc20Δ pds1Δ</i>          | Viable          | $ks_{b5}=0; ks_{b5,bf}=0; [CLB5T]=0;$                                                                                    |

Continued on next page

Table S5 – Continued from previous page

| Phenotype # | Phenotype name                            | Viable/Inviable | Changes in WT parameters                                                                                                                         |
|-------------|-------------------------------------------|-----------------|--------------------------------------------------------------------------------------------------------------------------------------------------|
|             |                                           |                 | $ks_{20}=0$ ; $ks_{20,m1}=0$ ; [CDC20T]=0; [CDC20A-APCP]=0;<br>$ks_{pds}=0$ ; [PDS1T]=0;                                                         |
| 72          | <i>CLB5-dbΔ cdc20Δ pds1Δ</i>              | Inviable        | $kd_{b5,20}=0$ ; $kd_{b5,20,i}=0$ ;<br>$ks_{20}=0$ ; $ks_{20,m1}=0$ ; [CDC20T]=0; [CDC20A-APCP]=0;<br>$ks_{pds}=0$ ; [PDS1T]=0;                  |
| 73          | <i>CLB5-dbΔ pds1Δ</i>                     | Viable          | $kd_{b5,20}=0$ ; $kd_{b5,20,i}=0$ ;<br>$ks_{pds}=0$ ; [PDS1T]=0;                                                                                 |
| 74          | <i>GAL-CDC20</i>                          | Inviable        | MDT=150; f=0.48; $ks_{20}=ks_{20}*1666.67$ ;                                                                                                     |
| 75          | <i>GALL-CDC20 sic1Δ cdh1Δ</i>             | Viable          | MDT=150; f=0.48; $ks_{20}=ks_{20}*1000$ ;<br>$ks_{ki}=ks_{ki}*0.125$ ; $ks_{ki,swi5}=ks_{ki,swi5}*0.125$ ;<br>[CKIT]=0.2;<br>CDH1T=0; [CDH1A]=0; |
| 76          | <i>GALL-CDC20 sic1Δ Cdc6Δ2-49 cdh1Δ</i>   | Viable          | MDT=150; f=0.48; $ks_{20}=ks_{20}*1000$ ;<br>$ks_{ki}=0$ ; $ks_{ki,swi5}=0$ ; [CKIT]=0; [CKIP]=0;<br>CDH1T=0; [CDH1A]=0;                         |
| 77          | <i>APC-A</i>                              | Viable          | $ka_{cp,b2}=0$ ;                                                                                                                                 |
| 78          | <i>APC-A sic1Δ</i>                        | Viable          | $ka_{cp,b2}=0$ ;<br>$ks_{ki}=ks_{ki}*0.125$ ; $ks_{ki,swi5}=ks_{ki,swi5}*0.125$ ;<br>[CKIT]=0.2;                                                 |
| 79          | <i>APC-A sic1Δ cdc6Δ2-49</i>              | Viable          | $ka_{cp,b2}=0$ ;<br>$ks_{ki}=0$ ; $ks_{ki,swi5}=0$ ; [CKIT]=0; [CKIP]=0;                                                                         |
| 80          | <i>APC-A cdh1Δ</i>                        | Inviable        | $ka_{cp,b2}=0$ ;<br>CDH1T=0; [CDH1A]=0;                                                                                                          |
| 81          | <i>APC-A cdh1Δ</i> in galactose           | Inviable        | $ka_{cp,b2}=0$ ; CDH1T=0; [CDH1A]=0;<br>MDT=150; f=0.48;                                                                                         |
| 82          | <i>APC-A cdh1Δ GAL-SIC1</i>               | Viable          | $ka_{cp,b2}=0$ ;<br>CDH1T=0; [CDH1A]=0;<br>MDT=150; f=0.48; $ks_{ki}=ks_{ki}*33.33$ ;                                                            |
| 83          | <i>APC-A cdh1Δ</i> multicopy <i>SIC1</i>  | Viable          | $ka_{cp,b2}=0$ ;<br>CDH1T=0; [CDH1A]=0;<br>$ks_{ki}=ks_{ki}*65$ ; $ks_{ki,swi5}=ks_{ki,swi5}*65$ ;                                               |
| 84          | <i>APC-A cdh1Δ</i> multicopy <i>CDC20</i> | Viable          | $ka_{cp,b2}=0$ ;<br>CDH1T=0; [CDH1A]=0;<br>$ks_{20}=ks_{20}*2$ ; $ks_{20,m1}=ks_{20,m1}*2$ ;                                                     |
| 85          | <i>APC-A GAL-CLB2</i>                     | Inviable        | $ka_{cp,b2}=0$ ; MDT=150; f=0.48; $ks_{b2}=ks_{b2}*49.40$ ;                                                                                      |
| 86          | <i>pds1Δ</i>                              | Viable          | $ks_{pds}=0$ ; [PDS1T]=0;                                                                                                                        |
| 87          | <i>PDS1-dbΔ</i>                           | Inviable        | $kd_{pds,20}=0$ ;                                                                                                                                |
| 88          | <i>GAL-PDS1-dbΔ</i>                       | Inviable        | MDT=150; f=0.48; $ks_{pds}=ks_{pds}*3.33$ ; $kd_{pds,20}=0$ ;                                                                                    |
| 89          | <i>esp1-ts</i>                            | Inviable        | ESP1T=0;                                                                                                                                         |
| 90          | <i>GAL-PDS1-dbΔ esp1-ts</i>               | Inviable        | MDT=150; f=0.48;<br>$ks_{pds}=ks_{pds}*3.33$ ; $kd_{pds,20}=0$ ; ESP1T=0;                                                                        |
| 91          | <i>GAL-ESP1 cdc20-ts</i>                  | Inviable        | MDT=150; f=0.48; ESP1T=ESP1T*2;<br>$ks_{20}=0$ ; $ks_{20,m1}=0$ ; [CDC20T]=0; [CDC20A-APCP]=0;                                                   |
| 92          | <i>ppxΔ</i>                               | Viable          | PPXT=0; [PPX]=0;                                                                                                                                 |
| 93          | <i>GAL-PPX</i>                            | Viable          | MDT=150; f=0.48; PPXT=PPXT*2;                                                                                                                    |
| 94          | <i>tem1Δ</i>                              | Inviable        | TEM1T=0; [TEM1]=0;                                                                                                                               |
| 95          | <i>net1-ts</i>                            | Viable          | $kas_{net}=kas_{net}*0.45$ ;                                                                                                                     |

Continued on next page

Table S5 – Continued from previous page

| Phenotype # | Phenotype name                  | Viable/Inviable | Changes in WT parameters                                                                    |
|-------------|---------------------------------|-----------------|---------------------------------------------------------------------------------------------|
| 96          | <i>tem1Δ net1-ts</i>            | Viable          | TEM1T=0; [TEM1]=0; $kas_{net}=kas_{net}*0.45$ ;                                             |
| 97          | <i>GAL-TEM1</i>                 | Viable          | TEM1T=TEM1T*5;                                                                              |
| 98          | <i>tem1-ts GAL-CDC15</i>        | Viable          | TEM1T=0; [TEM1]=0;<br>MDT=150; f=0.48; CDC15T=CDC15T*10;                                    |
| 99          | <i>tem1-ts multicopy CDC14</i>  | Viable          | TEM1T=0; [TEM1]=0; CDC14T=CDC14T*2;                                                         |
| 100         | Multicopy <i>CDC15</i>          | Viable          | CDC15T=CDC15T*20;                                                                           |
| 101         | <i>tem1-ts multicopy CDC15</i>  | Viable          | TEM1T=0; [TEM1]=0; CDC15T=CDC15T*20;                                                        |
| 102         | <i>net1-ts cdc20-ts</i>         | Inviable        | $kas_{net}=kas_{net}*0.45$ ;<br>$ks_{20}=0$ ; $ks_{20,m1}=0$ ; [CDC20T]=0; [CDC20A-APCP]=0; |
| 103         | <i>cdc15Δ</i>                   | Inviable        | CDC15T=0;                                                                                   |
| 104         | <i>cdc15Δ net1-ts</i>           | Viable          | CDC15T=0; $kas_{net}=kas_{net}*0.45$ ;                                                      |
| 105         | <i>cdc15Δ net1-ts cdh1Δ</i>     | Viable          | CDC15T=0;<br>$kas_{net}=kas_{net}*0.45$ ; CDH1T=0; [CDH1A]=0;                               |
| 106         | <i>cdc15-ts multicopy TEM1</i>  | Inviable        | CDC15T=0; TEM1T=TEM1T*5;                                                                    |
| 107         | <i>cdc15-ts multicopy CDC14</i> | Viable          | CDC15T=0; CDC14T=CDC14T*2;                                                                  |
| 108         | <i>TAB6-1</i>                   | Viable          | $kas_{net}=kas_{net}*0.5$ ;                                                                 |
| 109         | <i>cdc15Δ TAB6-1</i>            | Viable          | CDC15T=0; $kas_{net}=kas_{net}*0.5$ ;                                                       |
| 110         | <i>TAB6-1 clb5Δ clb6Δ</i>       | Inviable        | $kas_{net}=kas_{net}*0.5$ ;<br>$ks_{b5}=0$ ; $ks_{b5,bf}=0$ ; [CLB5T]=0;                    |
| 111         | <i>TAB6-1 CLB1 clb2Δ</i>        | Viable          | $kas_{net}=kas_{net}*0.5$ ;<br>$ks_{b2}=ks_{b2}*0.33$ ; $ks_{b2,m1}=ks_{b2,m1}*0.33$ ;      |
| 112         | <i>cdc14-ts</i>                 | Inviable        | CDC14T=0;                                                                                   |
| 113         | <i>cdc14-ts sic1Δ</i>           | Inviable        | CDC14T=0;<br>$ks_{ki}=ks_{ki}*0.125$ ; $ks_{ki,swi5}=ks_{ki,swi5}*0.125$ ;<br>[CKIT]=0.2;   |
| 114         | <i>cdc14-ts cdh1Δ</i>           | Inviable        | CDC14T=0; CDH1T=0; [CDH1A]=0;                                                               |
| 115         | <i>cdc14-ts GAL-SIC1</i>        | Inviable        | CDC14T=0; MDT=150; f=0.48;<br>$ks_{ki}=ks_{ki}*33.33$ ;                                     |
| 116         | <i>cdc14-ts GAL-CLN2</i>        | Inviable        | CDC14T=0; MDT=150; f=0.48;<br>$ks_{n2}=0.15$ ;                                              |
| 117         | <i>GAL-NET1</i>                 | Inviable        | MDT=150; f=0.48;<br>NET1T=NET1T*10.85;                                                      |
| 118         | <i>GAL-CDC14</i>                | Inviable        | MDT=150; f=0.48;<br>CDC14T=CDC14T*7;                                                        |
| 119         | <i>GAL-NET1 GAL-CDC14</i>       | Viable          | MDT=150; f=0.48;<br>CDC14T=CDC14T*7; NET1T=NET1T*10.85;                                     |

Table S6: Optimization results with different hypercube sizes

| Hypercube size | Mean number of hits | Standard deviation |
|----------------|---------------------|--------------------|
| ±40%           | 105.42              | 2.48               |
| ±20%           | 100.10              | 2.40               |
| ±90%           | 103.98              | 2.87               |

Mean and standard deviation values of the number of hits reached after 500 generations with 3 different hypercube sizes (50 independent runs for each size). All LH samples are generated from the TL parameter set with 72 hits. Population size is 19, initial populations are independently generated for each run without enforcing wild type viability in glucose.

Table S7: Eight phenotypes that are not captured by the best DE run

| Phenotype number | Phenotype name                     | $\bar{A}$ (100 LH samples) | $\bar{A}$ (19,000 LH samples) | $\bar{A}$ (19,000 DE samples) | $\hat{R}$ rank (100 LH samples) | $\hat{R}$ rank (19,000 LH samples) | $\hat{R}$ rank (19,000 DE samples) |
|------------------|------------------------------------|----------------------------|-------------------------------|-------------------------------|---------------------------------|------------------------------------|------------------------------------|
| 12               | <i>cln1Δ cln2Δ bck2Δ</i> (viable)  | 0.03                       | 0.05                          | 0.06                          | 48                              | 58                                 | 6                                  |
| 46               | <i>CLB5-dbΔ sic1Δ</i> (inviable)   | 0.94                       | 0.92                          | 0.09                          | 3                               | 12                                 | 1                                  |
| 48               | <i>GAL-CLB5 sic1Δ</i> (inviable)   | 0.88                       | 0.79                          | 0.08                          | 22                              | 9                                  | 3                                  |
| 55               | <i>GAL-CLB2 sic1Δ</i> (inviable)   | 0.86                       | 0.83                          | 0.08                          | 13                              | 11                                 | 2                                  |
| 66               | <i>CLB1 clb2Δ cdh1Δ</i> (inviable) | 0.57                       | 0.52                          | 0.08                          | 5                               | 6                                  | 5                                  |
| 67               | <i>CLB1 clb2Δ pds1Δ</i> (inviable) | 0.36                       | 0.35                          | 0.01                          | 2                               | 2                                  | 7                                  |
| 74               | <i>GAL-CDC20</i> (inviable)        | 0.41                       | 0.37                          | 0.01                          | 4                               | 4                                  | 8                                  |
| 117              | <i>GAL-NET1</i> (inviable)         | 0.52                       | 0.52                          | 0.01                          | 1                               | 1                                  | 4                                  |

Features of the eight phenotypes not captured by DE in the most optimal run that resulted in 111 hits.  $\bar{A}$  stands for the acceptance ratio of a phenotype,  $\hat{R}$  rank is based on the phenotype competitiveness (most competitive phenotype, with the lowest  $\hat{R}$  value, is ranked 1<sup>st</sup>).

Table S8: Most competitive phenotype pairs in LH samples

| Phenotype pair                                    | Correlation coefficient | Acceptance ratio |
|---------------------------------------------------|-------------------------|------------------|
| <i>cln1Δ cln2Δ</i> (viable)                       | -0.846                  | 0.07             |
| <i>cln1Δ cln2Δ cdh1Δ GAL-SIC1</i> (inviable)      |                         | 0.93             |
| <i>CLB2-dbΔ</i> in galactose (inviable)           | -0.808                  | 0.94             |
| <i>CLB2-dbΔ clb5Δ clb6Δ</i> in galactose (viable) |                         | 0.04             |
| WT in galactose (viable)                          | -0.698                  | 0.31             |
| <i>GAL-NET1</i> (inviable)                        |                         | 0.52             |
| <i>CLB5-dbΔ sic1Δ</i> (inviable)                  | -0.696                  | 0.94             |
| <i>cln1Δ cln2Δ bck2Δ</i> (viable)                 |                         | 0.03             |
| <i>APC-A cdh1Δ</i> in galactose (inviable)        | -0.657                  | 0.88             |
| <i>APC-A cdh1Δ GAL-SIC1</i> (viable)              |                         | 0.11             |
| <i>cln1Δ cln2Δ bck2Δ</i> (viable)                 | -0.656                  | 0.03             |
| <i>cln1Δ cln2Δ GAL-SIC1</i> (inviable)            |                         | 0.97             |
| <i>cln1Δ cln2Δ bck2Δ</i> (viable)                 | -0.656                  | 0.03             |
| <i>CLB2-dbΔ</i> (inviable)                        |                         | 0.97             |
| <i>sic1Δ</i> (viable)                             | -0.645                  | 0.06             |
| <i>CLB5-dbΔ sic1Δ</i> (inviable)                  |                         | 0.94             |
| <i>cln1Δ cln2Δ bck2Δ</i> (viable)                 | -0.641                  | 0.03             |
| <i>cln1Δ cln2Δ cdh1Δ GAL-SIC1</i> (inviable)      |                         | 0.93             |
| <i>sic1Δ</i> (viable)                             | -0.626                  | 0.06             |
| <i>GAL-CLB2 sic1Δ</i> (inviable)                  |                         | 0.86             |
| <i>CLB2-dbΔ</i> in galactose (inviable)           | -0.618                  | 0.94             |
| <i>APC-A</i> (viable)                             |                         | 0.10             |
| <i>cdh1Δ</i> (viable)                             | -0.607                  | 0.12             |
| <i>GAL-CLB5 cdh1Δ</i> (inviable)                  |                         | 0.73             |
| <i>GAL-PPX</i> (viable)                           | -0.601                  | 0.25             |
| <i>GAL-NET1</i> (inviable)                        |                         | 0.52             |

Strongly anticorrelated phenotype pairs (correlation coefficient  $< -0.6$ ) computed from 100 LH samples.

Table S9: Most competitive phenotype pairs in DE samples

| Phenotype pair                                                            | Correlation coefficient | Acceptance ratio |
|---------------------------------------------------------------------------|-------------------------|------------------|
| <i>GAL-NET1</i> (inviable)<br><i>GAL-PPX</i> (viable)                     | -0.812                  | 0.01<br>0.98     |
| <i>GAL-NET1</i> (inviable)<br>WT in galactose (viable)                    | -0.806                  | 0.01<br>0.99     |
| <i>GAL-NET1</i> (inviable)<br><i>GAL-TEM1</i> (viable)                    | -0.765                  | 0.01<br>0.98     |
| <i>GAL-NET1</i> (inviable)<br>WT in glucose (viable)                      | -0.763                  | 0.01<br>0.98     |
| <i>GAL-NET1</i> (inviable)<br>Multicopy <i>CDC15</i> (viable)             | -0.739                  | 0.01<br>0.98     |
| <i>CLB5-dbΔ sic1Δ</i> (inviable)<br><i>cln1Δ cln2Δ sic1Δ</i> (viable)     | -0.729                  | 0.09<br>0.89     |
| <i>GAL-NET1</i> (inviable)<br>Multicopy <i>BCK2</i> (viable)              | -0.694                  | 0.01<br>0.98     |
| <i>CLB5-dbΔ sic1Δ</i> (inviable)<br><i>swi5Δ</i> (viable)                 | -0.675                  | 0.09<br>0.91     |
| <i>CLB5-dbΔ sic1Δ</i> (inviable)<br><i>sic1Δ</i> (viable)                 | -0.671                  | 0.09<br>0.91     |
| <i>GAL-NET1</i> (inviable)<br><i>GAL-CLN3</i> (viable)                    | -0.661                  | 0.01<br>0.99     |
| <i>CLB5-dbΔ sic1Δ</i> (inviable)<br><i>APC-A sic1Δ cdc6Δ2-49</i> (viable) | -0.661                  | 0.09<br>0.87     |
| <i>CLB5-dbΔ sic1Δ</i> (inviable)<br><i>cln1Δ cln2Δ ckiΔ</i> (viable)      | -0.654                  | 0.09<br>0.91     |
| <i>CLB5-dbΔ sic1Δ</i> (inviable)<br><i>sic1Δ cdc6Δ (ckiΔ)</i> (viable)    | -0.646                  | 0.09<br>0.90     |
| <i>cln1Δ cln2Δ sic1Δ</i> (viable)<br><i>GAL-CLB2 sic1Δ</i> (inviable)     | -0.646                  | 0.89<br>0.08     |
| <i>swi5Δ</i> (viable)<br><i>GAL-CLB2 sic1Δ</i> (inviable)                 | -0.634                  | 0.91<br>0.08     |
| <i>GAL-NET1</i> (inviable)<br><i>cln1Δ cln2Δ GAL-CLN2</i> (viable)        | -0.629                  | 0.01<br>0.98     |
| <i>sic1Δ</i> (viable)<br><i>GAL-CLB2 sic1Δ</i> (inviable)                 | -0.627                  | 0.91<br>0.08     |
| <i>GAL-NET1</i> (inviable)<br><i>cln3Δ bck2Δ whi5Δ</i> (viable)           | -0.615                  | 0.01<br>0.98     |
| <i>GAL-NET1</i> (inviable)<br><i>tem1-ts multicopy CDC15</i> (viable)     | -0.612                  | 0.01<br>0.97     |

Strongly anticorrelated phenotype pairs (correlation coefficient  $< -0.6$ ) among 19,000 unique trial parameter vectors generated during DE.

Table S10: Least and most competitive phenotypes in LH samples

| Least competitive phenotypes                            | $\hat{R}$ | Most competitive phenotypes                               | $\hat{R}$ |
|---------------------------------------------------------|-----------|-----------------------------------------------------------|-----------|
| Multicopy <i>CDC15</i> (viable)                         | 13.71     | <i>GAL-NET1</i> ( <b>Phenotype 117</b> , inviable)        | -8.32     |
| WT in galactose (viable)                                | 13.31     | <i>CLB1 clb2Δ pds1Δ</i> ( <b>Phenotype 67</b> , inviable) | -7.86     |
| <i>CLB5-dbΔ</i> (viable)                                | 12.93     | <i>CLB5-dbΔ sic1Δ</i> ( <b>Phenotype 46</b> , inviable)   | -6.16     |
| <i>GAL-TEM1</i> (viable)                                | 12.78     | <i>GAL-CDC20</i> ( <b>Phenotype 74</b> , inviable)        | -5.88     |
| WT in glucose (viable)                                  | 12.78     | <i>CLB1 clb2Δ cdh1Δ</i> ( <b>Phenotype 66</b> , inviable) | -4.81     |
| <i>cln3Δ bck2Δ whi5Δ</i> (viable)                       | 11.83     | <i>GAL-CLB5 cdh1Δ</i> (inviable)                          | -4.29     |
| <i>GAL-SIC1</i> (viable)                                | 11.41     | <i>tem1Δ</i> (inviable)                                   | -3.75     |
| <i>GAL-CLN3</i> (viable)                                | 11.35     | <i>cdc15Δ</i> (inviable)                                  | -3.75     |
| Multicopy <i>BCK2</i> (viable)                          | 11.11     | <i>cdc15-ts</i> multicopy <i>TEM1</i> (inviable)          | -3.75     |
| <i>swi5Δ cdh1Δ GAL-SIC1</i> (viable)                    | 10.76     | <i>cln1Δ cln2Δ GAL-SIC1</i> (inviable)                    | -3.39     |
| <i>GAL-PPX</i> (viable)                                 | 9.83      | <i>cln1Δ cln2Δ sic1Δ</i> (viable)                         | -3.24     |
| <i>cln1Δ cln2Δ GAL-CLN2</i> (viable)                    | 9.28      | <i>APC-A sic1Δ</i> (viable)                               | -3.24     |
| <i>cln1Δ cln2Δ cln3Δ</i> multicopy <i>BCK2</i> (viable) | 9.21      | <i>GAL-CLB2 sic1Δ</i> ( <b>Phenotype 55</b> , inviable)   | -3.00     |
| <i>GAL-CLB2</i> (viable)                                | 8.96      | <i>cln1Δ cln2Δ cdh1Δ GAL-SIC1</i> (inviable)              | -2.94     |
| <i>CLB5-dbΔ pds1Δ</i> (viable)                          | 8.88      | <i>TAB6-1 clb5Δ clb6Δ</i> (inviable)                      | -2.92     |
| <i>TAB6-1</i> (viable)                                  | 8.85      | <i>cdc20Δ pds1Δ</i> (inviable)                            | -2.87     |
| <i>cln1Δ cln2Δ cln3Δ GAL-CLN2</i> (viable)              | 8.73      | <i>CLB5-dbΔ cdc20Δ pds1Δ</i> (inviable)                   | -2.87     |
| <i>cln1Δ cln2Δ cln3Δ bck2Δ GAL-CLN2</i> (viable)        | 8.68      | <i>GAL-CLB5-dbΔ</i> (inviable)                            | -2.75     |
| <i>cln1Δ cln2Δ cln3Δ GAL-CLN3</i> (viable)              | 8.59      | <i>GAL-ESP1 cdc20-ts</i> (inviable)                       | -2.22     |
| <i>CLB1 clb2Δ</i> (viable)                              | 8.58      | <i>CLB2-dbΔ clb5Δ clb6Δ</i> in galactose (viable)         | -2.04     |
| <i>cln1Δ cln2Δ GAL-SIC1 GAL-CLN2</i> (viable)           | 8.55      | <i>GAL-CLB2 cdh1Δ</i> (inviable)                          | -1.98     |
| <i>pds1Δ</i> (viable)                                   | 8.37      | <i>GAL-CLB5 sic1Δ</i> ( <b>Phenotype 48</b> , inviable)   | -1.96     |
| <i>cln1Δ cln2Δ cdh1Δ GAL-SIC1 GAL-CLN2</i> (viable)     | 8.16      |                                                           |           |
| <i>net1-ts</i> (viable)                                 | 7.81      |                                                           |           |
| <i>GAL-CLB5</i> (viable)                                | 7.32      |                                                           |           |
| <i>clb5Δ clb6Δ</i> (viable)                             | 7.15      |                                                           |           |
| <i>GAL-NET1 GAL-CDC14</i> (viable)                      | 7.08      |                                                           |           |
| <i>APC-A cdh1Δ</i> multicopy <i>SIC1</i> (viable)       | 7.01      |                                                           |           |
| <i>net1-ts cdc20-ts</i> (inviable)                      | 6.84      |                                                           |           |
| <i>GAL-CLB2-dbΔ</i> (inviable)                          | 6.84      |                                                           |           |

The least competitive 30 phenotypes and the most competitive 22 phenotypes based on the  $\hat{R}$  values (defined in the main text) computed from 100 LH samples. The most competitive phenotype has the lowest  $\hat{R}$  value, whereas the least competitive phenotype has the highest  $\hat{R}$  value. When 19,000 independently generated LH samples were taken, 26 of the least competitive 30 phenotypes were common. Similarly, all of the 22 most competitive phenotypes were common among 100 and 19,000 LH samples. Phenotype numbers for the 8 phenotypes that are not captured by the best DE run are marked in bold.

Table S11: The least critical model parameters

| Parameter name    | Parameter description           |
|-------------------|---------------------------------|
| $ks_{bud,e}$      | Time scale for BUD synthesis    |
| $e_{bud,n3}$      | Cln3 activation of BUD          |
| $e_{bud,n2}$      | Cln2 activation of BUD          |
| $e_{bud,b5}$      | Clb5 activation of BUD          |
| $e_{bud,b2}$      | Clb2 activation of BUD          |
| $kd_{bud}$        | BUD degradation                 |
| $[Cln3]_0$        | Initial Cln3                    |
| $[Bck2]_0$        | Initial Bck2                    |
| $[WHI5dep]_0$     | Initial active Whi5             |
| $[SBFdep]_0$      | Initial active SBF              |
| $[Cln2]_0$        | Initial Cln2                    |
| $[CKI_T]_0$       | Initial active CKI              |
| $[[CKI_P]_0$      | Initial inactive CKI            |
| $[Clb5_T]_0$      | Initial Clb5                    |
| $[Clb2_T]_0$      | Initial Clb2                    |
| $[BUD]_0$         | Initial BUD                     |
| $[ORI]_0$         | Initial ORI                     |
| $[SPN]_0$         | Initial SPN                     |
| $[Swi5_T]_0$      | Initial SWI5                    |
| $[CDC20_T]_0$     | Initial Cdc20                   |
| $[Cdc20A-APCP]_0$ | Initial Cdc20A-APCP             |
| $[APCP]_0$        | Initial APCP                    |
| $[Cdh1_A]_0$      | Initial active Cdh1             |
| $[Net1dep]_0$     | Initial active Net1             |
| $[PPX]_0$         | Initial PPX                     |
| $[Pds1_T]_0$      | Initial Pds1                    |
| $[Cdc15]_0$       | Initial Cdc15                   |
| $[Tem1]_0$        | Initial Tem1                    |
| $[Polo_T]_0$      | Initial Polo                    |
| $[Polo_A]_0$      | Initial active Polo             |
| $[Cdc20A-APC]_0$  | Initial Cdc20A-APC              |
| $e_{h1,n3}$       | Cdh1 inactivation by Cln3       |
| $ka_{tem}$        | Basal Tem1 activation           |
| $ka_{15}$         | Basal Cdc15 activation          |
| $ks_{lo}$         | Basal Polo synthesis            |
| $kd_{ori}$        | Degradation of ORI              |
| $ka_{tem,p1}$     | Tem1 activation by Esp1         |
| $ka_{lo}$         | Basal Polo activation           |
| $ki_{tem,px}$     | Tem1 inactivation by PPX        |
| $kp_{i5b5}$       | Whi5 phosphorylation by Clb5    |
| $ki_{15,b2}$      | Cdc15 inactivation by Clb2      |
| $ki_{h1}$         | Basal inactivation of Cdh1      |
| $kd_{lo,h1}$      | Polo degradation by Cdh1        |
| $ki_{px}$         | Basal PPX inactivation          |
| $kd_{pnet,14}$    | Net1 dephosphorylation by Cdc14 |
| $kd_{lo}$         | Basal Polo degradation          |
| $kp_{net,15}$     | Net1 phosphorylation by Cdc15   |
| $ki_{swi5,b2}$    | Swi5 inactivation by Clb2       |
| $e_{ki,k2}$       | CKI phosphorylation by Bck2     |
| $kd_{pi514}$      | Whi5 dephosphorylation by Cdc14 |

50 least critical model parameters that do not have an influence on the model's ability to capture mutant phenotypes.
