# Supplementary material for: Optimization and model reduction in the high dimensional parameter space of a budding yeast cell cycle model
Source: PubMed Central journal article supplement (PMC3702416; doi:10.1186/1752-0509-7-53), 2013-06-28
Supplement: 1752-0509-7-53-S3.pdf [file 1752-0509-7-53-S3.pdf]

## Supplementary Text

### Latin hypercube sampling

Latin hypercube (LH) sampling is a method [1] for generating a distribution of parameter sets from a multidimensional distribution:

- Let  $x$  represent a  $D$  dimensional parameter vector  $x = x_1, x_2, \dots, x_D$ .  $D$  is also the number of parameters in our ODE model.
- When sampling for  $M$  parameter vectors (sets), the range of each parameter is divided into  $M > 1$  mutually exclusive intervals.
- One sample point is randomly selected from each interval for the first parameter  $x_1$ . Hence,  $M$  values are sampled:  $x_{1,1}$  through  $x_{1,M}$ . These values are paired with  $M$  values sampled for the second parameter  $x_2$  randomly without replacement, which means that each  $x_2$  value is paired with only one value of  $x_1$ .
- Then, these  $M$  pairs are combined with  $M$  values of  $x_3$ , once again without replacement and  $M$  triplets are obtained.
- This procedure is continued until  $M$   $D$ -tuplets are generated.

LHS provides a fairly uniform coverage of each parameter range by dividing each range into a number of intervals. The number of intervals is equal to the number of samples.

### References

1. Santner TJ, Williams B, Notz W: *The Design and Analysis of Computer Experiments*. Springer-Verlag 2003.
