# Supplementary material for: Optimization and model reduction in the high dimensional parameter space of a budding yeast cell cycle model
Source: PubMed Central journal article supplement (PMC3702416; doi:10.1186/1752-0509-7-53), 2013-06-28
Supplement: 1752-0509-7-53-S4.pdf [file 1752-0509-7-53-S4.pdf]

## Supplementary Figures

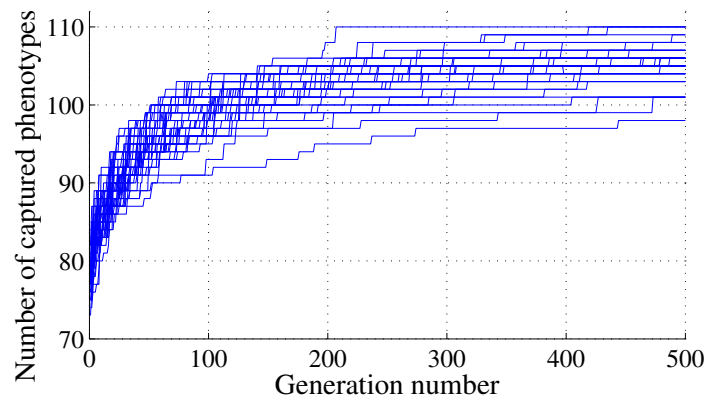

**Figure S1.** Evolution of the number of mutants captured with 50 independent DE runs. Each run starts with a different initial population of 19 LH samples (independently generated populations with  $\pm 40\%$  LH sampling, wild type viability not enforced). The number of phenotypes captured after 500 generations has a 105.42 mean and 2.48 standard deviation (Table S6).

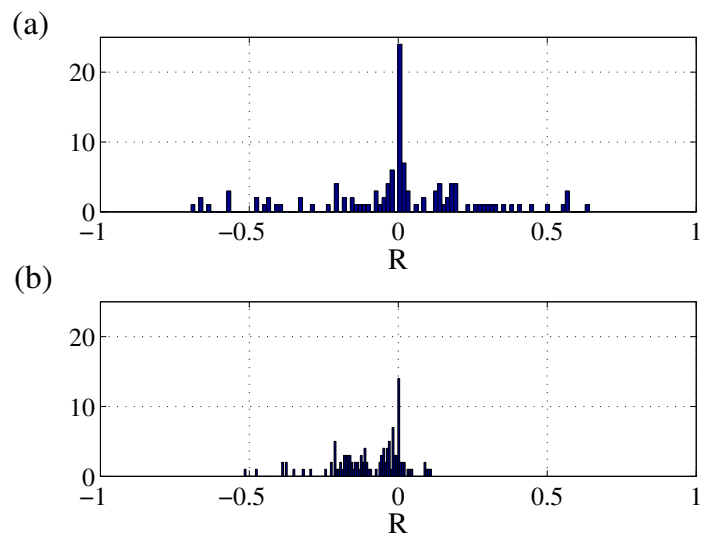

**Figure S2.** Distribution of the pairwise correlations ( $R$  values) of Phenotype 12 with the remaining 118 phenotypes in (a) 100 LH samples and (b) 19,000 DE samples (trial parameter vectors).
